# Supplementary material for: Spatiotemporal evaluation of EMEP4UK-WRF v4.3 atmospheric chemistry transport simulations of health-related metrics for NO 2 , O 3 , PM 10 , and PM 2. 5 for 2001–2010
Source: Copernicus journal article supplement (doi:10.5194/gmd-10-1767-2017), 2017-04-27
Supplement: Supplementary file 1 [file gmd-10-1767-2017-supplement.pdf]

Supplement of Geosci. Model Dev., 10, 1767–1787, 2017  
<http://www.geosci-model-dev.net/10/1767/2017/>  
doi:10.5194/gmd-10-1767-2017-supplement  
© Author(s) 2017. CC Attribution 3.0 License.

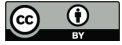

*Supplement of*

**Spatiotemporal evaluation of EMEP4UK-WRF v4.3 atmospheric chemistry transport simulations of health-related metrics for NO<sub>2</sub>, O<sub>3</sub>, PM<sub>10</sub>, and PM<sub>2.5</sub> for 2001–2010**

**Chun Lin et al.**

*Correspondence to:* Mathew R. Heal (m.heal@ed.ac.uk)

The copyright of individual parts of the supplement might differ from the CC-BY 3.0 licence.

## **Supplementary Information**

### **A. Sites supplying measurement data used in this study**

Table S1 lists the names and locations of the UK Automated Urban and Rural Network (AURN) stations used in this study. The percentage data captures for each pollutant at each site are also presented. The criteria for data capture are described in Section 2.2 of the main paper. More detail on each site is available online ([uk-air.defra.gov.uk](http://uk-air.defra.gov.uk)).

### **B. Long-term averaged model-measurement concentrations by temperature**

Figure S1 presents an analogous figure to Figure 1 – i.e. scatter plots of the 10-y means of the modelled and measured pollutant daily metrics at each site, grouped by site type – but with data markers shaded according to the 10-y mean temperature at the measurement site. The correlations between the normalised model-measurement bias at each site of a given site type with temperature (for a given pollutant) are given in Table 2 of the main paper.

### **C. Analysis of model-measurement statistics averaged by hour of the day**

The focus in the main paper is model-measurement comparisons at daily and annual averaging resolution, but concentration data were available at hourly resolution and figures and discussion of the comparison statistics for NO<sub>2</sub> and O<sub>3</sub> averaged by hour of day are presented in Figure S2 and Table S2.

The model-measurement statistics for NO<sub>2</sub> concentrations averaged by hour of day shown in Figures S2a-d reveal some diurnal variation in these statistic. Model-measurement negative bias for hourly NO<sub>2</sub> concentration at UB sites increased from 05:00-06:00 through the morning rush hours (Figure S2c), coincident with the increase in traffic movements (Figure S3a) and the consequent increase in NO<sub>x</sub> and VOC emissions (Figure S3b) imposed on the model. NO<sub>x</sub> emissions decreased after the morning rush hours, and the model negative bias in urban areas continued to increase until midday. Model underestimation reduced steadily after the evening rush hours when both emissions and photochemical reactions are lower than in daytime. Model-measurement RMSE was also generally poorer (i.e. greater) during the day than during night (Figure S3d). The model NO<sub>2</sub> daytime lifetime may be too short, again likely due to the over-dilution of NO<sub>x</sub> emissions into the model grid (in more concentrated NO<sub>2</sub> environments OH is depleted to the main NO<sub>2</sub> loss process of HNO<sub>3</sub> formation is slower in the model than in the vicinity of the monitor). The model-measurement correlation for hourly NO<sub>2</sub> remained more consistent throughout the day (Figure S3a); correlations were similar at the two types of background sites (mean of median  $r = 0.64$  and  $0.60$  at RB and UB sites, respectively). Correlation coefficients were slightly lower when emissions increased at

the morning rush hour (Figure S3b), particularly at the urban sites, but due to the large inter-site variability, this reduction in correlation was not statistically significant (Figure S2a).

For hourly O<sub>3</sub>, model-measurement correlation was similar at both types of background sites (mean of median  $r = 0.68$  and  $0.70$  at RB and UB sites, respectively) (Figure S2e) and varied little during the day. Model positive bias for hourly O<sub>3</sub> concentrations at both RB and UB sites increased to peak in the morning rush hours (Figure S2g), and gradually reduced thereafter. Model RMSE also increased at UB sites during daytime, but not at RB sites (Figure S2h). The trend for bias in hourly O<sub>3</sub> is associated with the increased model underestimation of NO<sub>2</sub>, for similar reasons, but is less pronounced because of the somewhat slower timescales for O<sub>3</sub> chemistry.

Overall, these data for model-measurement comparison by hour-of-day support the general trends presented in the main paper for the longer averaging periods, in particular that correlations are generally consistent throughout the day but that bias showed systematic variation, interpreted as a mismatch with reality of the hour-of-day emissions factors used to disaggregate the supplied annual NO<sub>x</sub> emissions totals, and to over-dilution of the NO<sub>x</sub> emissions into the model grid compared to the siting of the monitor for UB sites.

**Table S1:** The names and locations of the UK Automated Urban and Rural Network stations used in this study, with their measurement data availability, listed by site type (RB, rural background; UB, urban background). NA means no contributing measurements.

| Site                   | Site type | Latitude (°) | Longitude (°) | Data Capture Proportion |                |                  |                        |
|------------------------|-----------|--------------|---------------|-------------------------|----------------|------------------|------------------------|
|                        |           |              |               | NO <sub>2</sub>         | O <sub>3</sub> | PM <sub>10</sub> | PM <sub>2.5</sub> (2y) |
| Aston Hill             | RB        | 52.50385     | -3.034178     | NA                      | 92%            | NA               | NA                     |
| Auchencorth Moss       | RB        | 55.79216     | -3.2429       | NA                      | NA             | NA               | 84%                    |
| Bottesford             | RB        | 52.93028     | -0.814722     | NA                      | 99%            | NA               | NA                     |
| Bush Estate            | RB        | 55.862281    | -3.205782     | NA                      | 97%            | NA               | NA                     |
| Eskdalemuir            | RB        | 55.31531     | -3.206111     | NA                      | 96%            | NA               | NA                     |
| Glazebury              | RB        | 53.46008     | -2.472056     | NA                      | 90%            | NA               | NA                     |
| Harwell                | RB        | 51.571078    | -1.325283     | 97%                     | 94%            | 94%              | 86%                    |
| High Muffles           | RB        | 54.334944    | -0.80855      | NA                      | 88%            | NA               | NA                     |
| Ladybower              | RB        | 53.40337     | -1.752006     | 87%                     | 90%            | NA               | NA                     |
| Lough Navar            | RB        | 54.43951     | -7.900328     | NA                      | 90%            | 91%              | NA                     |
| Lullington Heath       | RB        | 50.7937      | 0.18125       | 97%                     | 88%            | NA               | NA                     |
| Mace Head              | RB        | 53.326444    | -9.903917     | NA                      | 98%            | NA               | NA                     |
| Narberth               | RB        | 51.781784    | -4.691462     | 93%                     | NA             | 79%              | NA                     |
| Rochester Stoke        | RB        | 51.45617     | 0.634889      | 89%                     | 92%            | 78%              | NA                     |
| Sibton                 | RB        | 52.2944      | 1.463497      | NA                      | 92%            | NA               | NA                     |
| St Osyth               | RB        | 51.77798     | 1.049031      | 84%                     | 77%            | NA               | NA                     |
| Weybourne              | RB        | 52.95049     | 1.122017      | NA                      | 84%            | NA               | NA                     |
| Wicken Fen             | RB        | 52.2985      | 0.290917      | 90%                     | 91%            | NA               | NA                     |
| Yarner Wood            | RB        | 50.5976      | -3.71651      | NA                      | 94%            | NA               | NA                     |
|                        |           |              |               |                         |                |                  |                        |
| Aberdeen               | UB        | 57.15736     | -2.094278     | 95%                     | NA             | 92%              | NA                     |
| Barnsley Gawber        | UB        | 53.56292     | -1.510436     | 93%                     | 93%            | NA               | NA                     |
| Belfast Centre         | UB        | 54.59965     | -5.928833     | 92%                     | 93%            | 87%              | 91%                    |
| Birmingham Centre      | UB        | 52.479724    | -1.908078     | 76%                     | NA             | NA               | NA                     |
| Bournemouth            | UB        | 50.73957     | -1.826744     | 96%                     | 76%            | NA               | NA                     |
| Bristol St Paul's      | UB        | 51.462839    | -2.584482     | NA                      | NA             | NA               | 93%                    |
| Canterbury             | UB        | 51.27399     | 1.098061      | 98%                     | NA             | NA               | NA                     |
| Cardiff Centre         | UB        | 51.48178     | -3.17625      | 94%                     | 92%            | 82%              | 90%                    |
| Chesterfield           | UB        | 53.230583    | -1.433611     | NA                      | NA             | NA               | 94%                    |
| Coventry Memorial Park | UB        | 52.394399    | -1.519612     | 95%                     | 85%            | NA               | 93%                    |
| Cwmbran                | UB        | 51.6538      | -3.006953     | 89%                     | NA             | NA               | NA                     |
| Derry                  | UB        | 55.001225    | -7.329115     | 96%                     | 91%            | 89%              | NA                     |
| Edinburgh St Leonards  | UB        | 55.945589    | -3.182186     | NA                      | NA             | NA               | 94%                    |
| Glasgow Centre         | UB        | 55.85773     | -4.255161     | 88%                     | 96%            | 83%              | 99%                    |
| Glasgow City Chambers  | UB        | 55.860414    | -4.245959     | 99%                     | NA             | NA               | NA                     |
| Hull Freetown          | UB        | 53.74878     | -0.341222     | 76%                     | 77%            | NA               | 92%                    |
| Leamington Spa         | UB        | 52.28881     | -1.533119     | 87%                     | 95%            | 90%              | 97%                    |
| Leeds Centre           | UB        | 53.80378     | -1.546472     | 95%                     | 94%            | 94%              | 96%                    |
| Leicester Centre       | UB        | 52.631348    | -1.133006     | 96%                     | 94%            | 89%              | NA                     |
| London Bloomsbury      | UB        | 51.52229     | -0.125889     | 84%                     | 92%            | 85%              | 88%                    |
| London Haringey        | UB        | 51.58603     | -0.126486     | NA                      | 90%            | NA               | NA                     |
| London Harrow Stanmore | UB        | 51.617333    | -0.298777     | NA                      | NA             | NA               | 83%                    |

|                        |    |           |           |     |     |     |     |
|------------------------|----|-----------|-----------|-----|-----|-----|-----|
| London Hillingdon      | UB | 51.49633  | -0.460861 | 95% | 94% | NA  | NA  |
| London N. Kensington   | UB | 51.52105  | -0.213492 | 97% | 96% | 93% | 95% |
| London Teddington      | UB | 51.42099  | -0.339647 | 94% | 96% | NA  | 87% |
| London Westminster     | UB | 51.49467  | -0.131931 | 85% | 85% | NA  | NA  |
| Manchester Piccadilly  | UB | 53.48152  | -2.237881 | 88% | 94% | 78% | NA  |
| Newcastle Centre       | UB | 54.97825  | -1.610528 | 91% | 94% | 94% | 93% |
| Newport                | UB | 51.601203 | -2.977281 | NA  | NA  | NA  | 99% |
| Northampton            | UB | 52.27349  | -0.885933 | 90% | NA  | NA  | NA  |
| Nottingham Centre      | UB | 52.95473  | -1.146447 | 94% | 97% | 85% | 81% |
| Oxford St Ebbes        | UB | 51.744806 | -1.260278 | NA  | NA  | NA  | 95% |
| Plymouth Centre        | UB | 50.37167  | -4.142361 | 89% | 76% | 77% | NA  |
| Portsmouth             | UB | 50.82881  | -1.068583 | 99% | 76% | 82% | 82% |
| Preston                | UB | 53.76559  | -2.680353 | 92% | 94% | 77% | 84% |
| Reading New Town       | UB | 51.45309  | -0.944067 | NA  | NA  | NA  | 90% |
| Sandwell West Bromwich | UB | 52.52062  | -1.995556 | 94% | 95% | NA  | NA  |
| Sheffield Centre       | UB | 53.37772  | -1.473306 | 91% | 97% | 94% | 91% |
| Sheffield Tinsley      | UB | 53.41058  | -1.396139 | 88% | NA  | NA  | NA  |
| Southampton Centre     | UB | 50.90814  | -1.395778 | 93% | 92% | 92% | 85% |
| Southend-on-Sea        | UB | 51.544206 | 0.678408  | 89% | 94% | NA  | 95% |
| Stoke-on-Trent Centre  | UB | 53.02821  | -2.175133 | 98% | 93% | 90% | 97% |
| Sunderland Silksworth  | UB | 54.88361  | -1.406878 | NA  | NA  | NA  | 78% |
| Thurrock               | UB | 51.47707  | 0.317969  | 94% | 96% | 91% | NA  |
| Walsall Willenhall     | UB | 52.60821  | -2.033144 | 85% | NA  | NA  | NA  |
| Wirral Tranmere        | UB | 53.37287  | -3.022722 | 89% | 85% | NA  | 86% |
| York Bootham           | UB | 53.967513 | -1.086514 | NA  | NA  | NA  | 98% |

**Figure S1:** Scatter plots of the 10-year means of the modelled and measured pollutant daily metrics at each site, grouped by site type, and with data markers shaded according to the temperature of the measurement site: (a) NO<sub>2</sub>; (b) O<sub>3</sub>; (c) PM<sub>10</sub>; (d) PM<sub>2.5</sub>. The values of *r*, FAC2, NMB and RMSE associated with the data in each plot are given in Table 1. The solid and dashed lines are the 1:1, and the 2:1 and 1:2 lines, respectively. The green lines show values for model performance criteria for each pollutant taking account of variable measurement uncertainty using formulae and variable values published by the FAIRMODE project ([fairmode.jrc.ec.europa.eu](http://fairmode.jrc.ec.europa.eu)). See main text for further details.

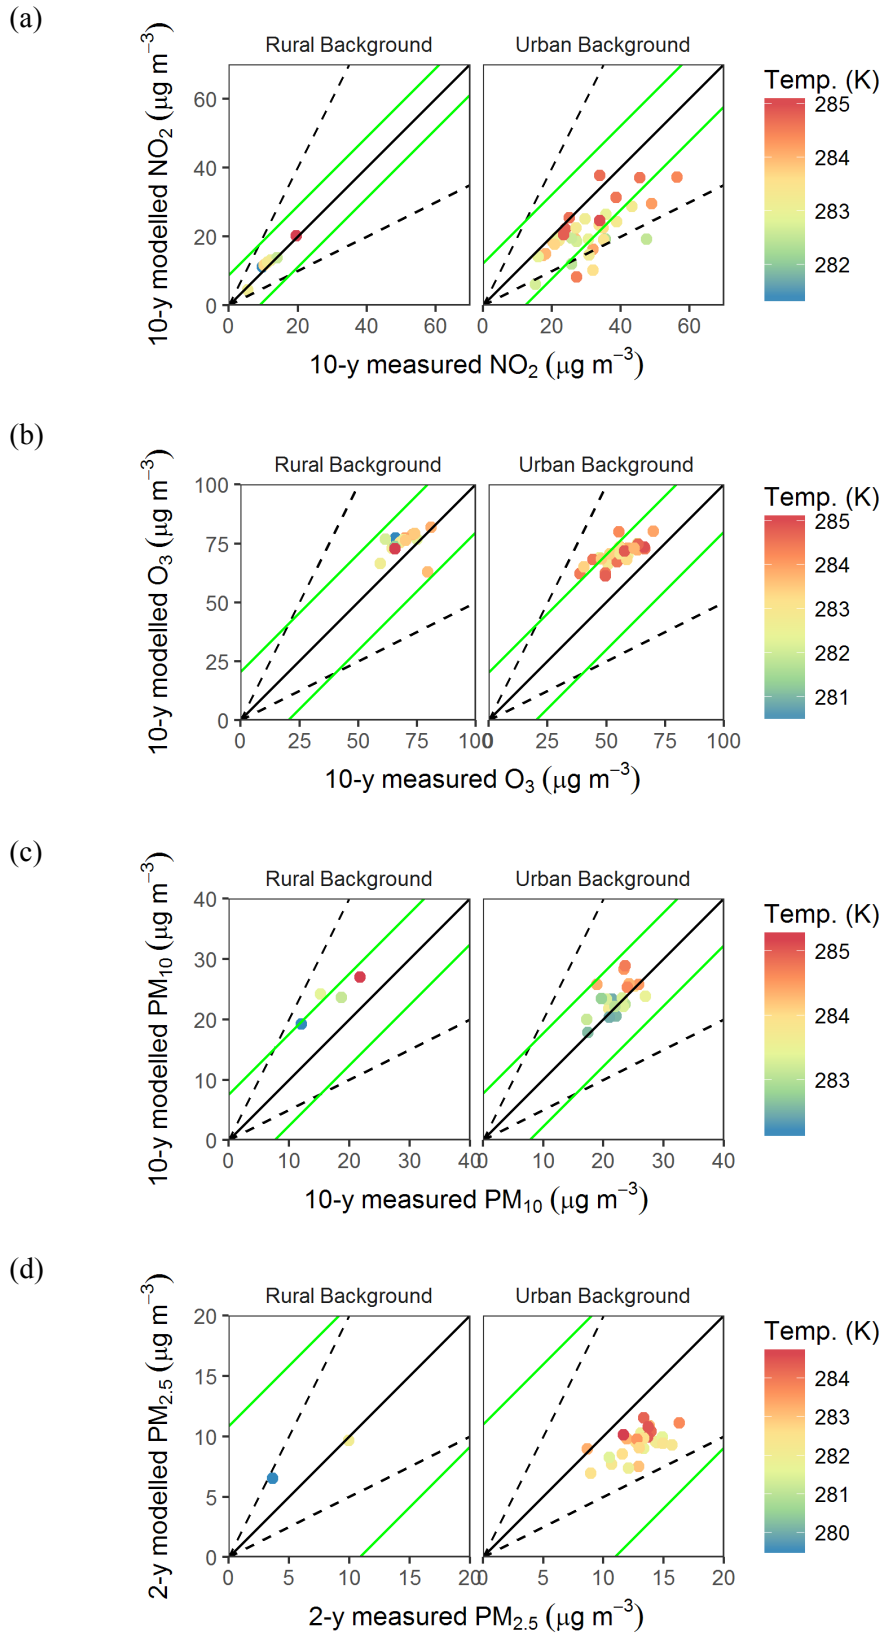

**Figure S2:** Model-measurement statistics per site for (a-d) NO<sub>2</sub> hourly and (e-h) O<sub>3</sub> hourly concentrations during 2001-2010, by site type, and by hour of day. (a) and (e) are correlation coefficient ( $r$ ), (b) and (f) are fraction of data pairs within a factor of two (FAC2), (c) and (g) are normalised mean bias (NMB), and (d) and (h) are RMSE. Dots show individual site statistics, which are summarised in the superimposed box-plot whose shading demarcates the interquartile range (IQR) and whose whiskers extend to the largest and smallest value within  $1.58 \times$  IQR from the box hinges.

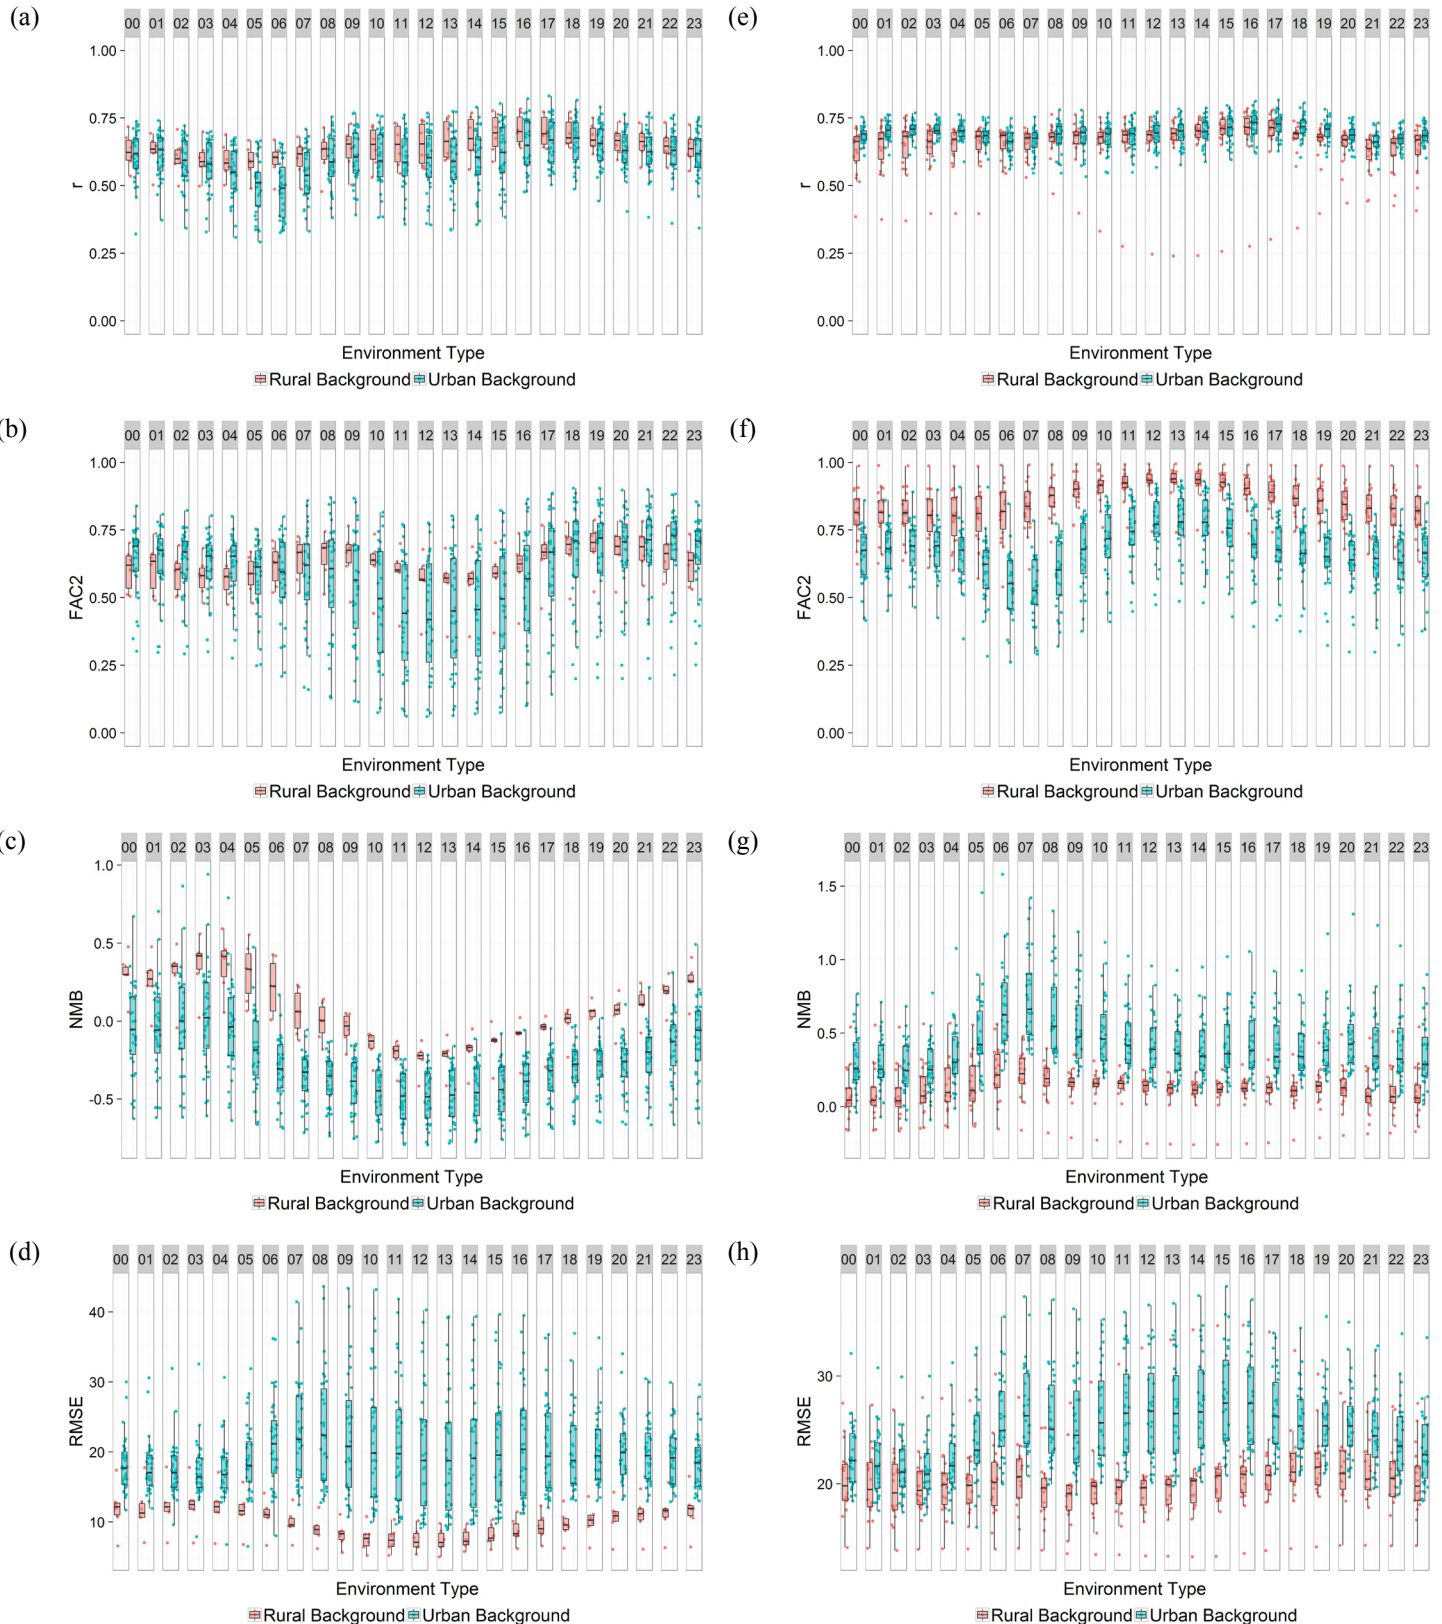

**Figure S3:** (a) Normalised traffic distribution (all vehicles) on all roads by time of day and day of week in the UK in 2010 (DfT, 2011). Road traffic statistics in Years 2008 and 2009 showed similar diurnal variation to this figure. (b) Normalised emission factors used by EMEP4UK to disaggregate road-traffic  $\text{NO}_x$  emissions by time of day and day of week. Road-traffic VOC emissions in the model use the same factors.

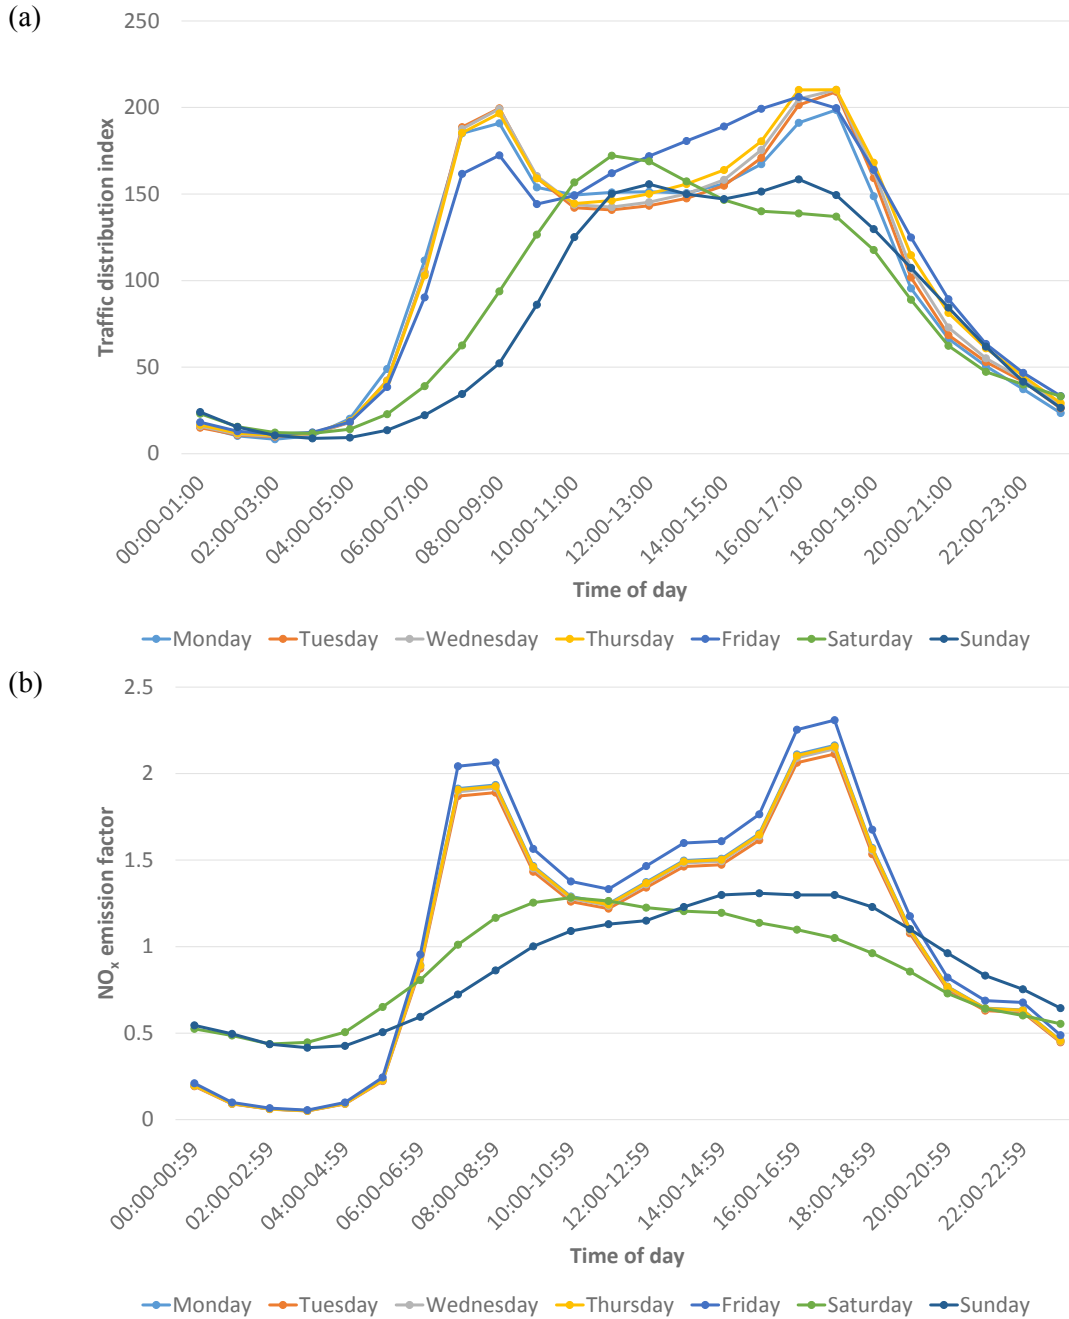



**Table S2:** Median (25<sup>th</sup> percentile, 75<sup>th</sup> percentile) values of the  $n$  individual-site model-measurement statistics of hourly NO<sub>2</sub> and O<sub>3</sub> for the full 10-y period, grouped by site type: RB, rural background; UB, urban background.

|                                | $n$ | $r$               | FAC2              | NMB                  | MB / $\mu\text{g m}^{-3}$ | RMSE / $\mu\text{g m}^{-3}$ |
|--------------------------------|-----|-------------------|-------------------|----------------------|---------------------------|-----------------------------|
| <b>NO<sub>2</sub>_hourmean</b> |     |                   |                   |                      |                           |                             |
| <b>RB</b>                      | 6   | 0.63 (0.60, 0.68) | 0.63 (0.59, 0.66) | 0.10 (0.05, 0.12)    | 1.12 (0.82, 1.31)         | 10.19 (9.48, 10.58)         |
| <b>UB</b>                      | 35  | 0.56 (0.51, 0.65) | 0.60 (0.50, 0.69) | -0.28 (-0.42, -0.15) | -9.22 (-15.06, -3.19)     | 19.40 (15.16, 24.21)        |
| <b>O<sub>3</sub>_hourmean</b>  |     |                   |                   |                      |                           |                             |
| <b>RB</b>                      | 17  | 0.70 (0.68, 0.73) | 0.86 (0.82, 0.90) | 0.13 (0.09, 0.19)    | 6.61 (5.34, 7.84)         | 20.09 (18.96, 21.44)        |
| <b>UB</b>                      | 31  | 0.71 (0.69, 0.74) | 0.67 (0.62, 0.75) | 0.37 (0.25, 0.51)    | 14.88 (11.95, 20.09)      | 24.69 (22.34, 27.89)        |
